# Supplementary material for: CoAl-LDHs@Fe3O4 decorated with cobalt nanowires and cobalt nanoparticles for a heterogeneous electro-Fenton process to degrade 1-hydroxyethane-1,1-diphosphonic acid and glyphosate
Source: PubMed Central journal article supplement — RSC Adv. 2022 Jan 20;12(5):2623–31. doi: 10.1039/d1ra08493c (PMC8979163; doi:10.1039/d1ra08493c), 2022-01-20
Supplement: RA-012-D1RA08493C-s001.pdf [file RA-012-D1RA08493C-s001.pdf]

Supplementary material

for

**CoAl-LDHs@Fe<sub>3</sub>O<sub>4</sub> decorated by Cobalt Nanowires and  
Cobalt Nanoparticles in Heterogeneous Electro-Fenton  
process to Degrade 1-hydroxyethane 1,1-diphosphonic acid  
and Glyphosate**

Kexin Zhou <sup>1</sup>, Xing-peng Liu <sup>2</sup>, Hongyun Guo <sup>1</sup>, Hui-qiang Li <sup>1,\*</sup>, Ping Yang

<sup>1</sup> College of Architecture and Environment, Sichuan University, Chengdu 610065,  
China.

<sup>2</sup> College of Communication Engineering, Chengdu Technological University,  
Chengdu 611730, China

E-mail: [zhoukexin99@126.com](mailto:zhoukexin99@126.com), [lxp\\_herb@163.com](mailto:lxp_herb@163.com), [1343906011@qq.com](mailto:1343906011@qq.com),  
[lhq\\_scu@163.com](mailto:lhq_scu@163.com), [yping63@163.com](mailto:yping63@163.com)

Tel. +8613018291476, +8618980669653, +8613767013475, +8618980668020,  
+8618602804508

\* Author to whom correspondence should be addressed; E-mail: [lhq\\_scu@163.com](mailto:lhq_scu@163.com)

Tel. +8618980668020

**Figures: 5**

**Tables: 1**

**Pages: 7 (including the cover page)**

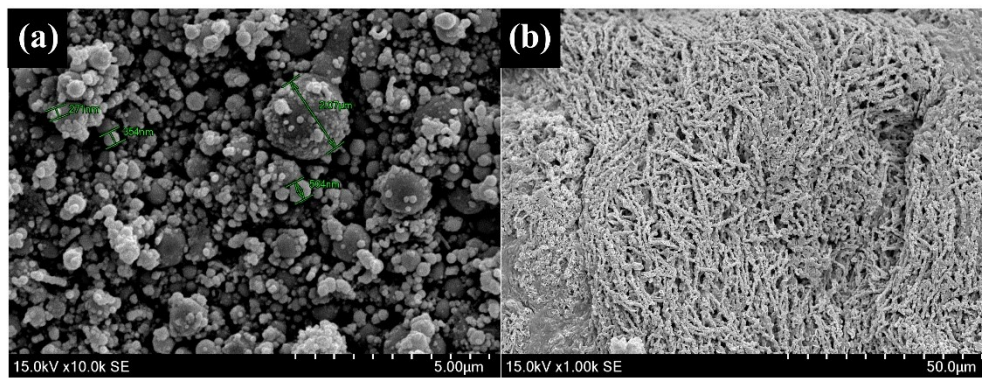

**Fig. S1.** (a): the SEM image (with higher magnification) of CoNPs; (b): the SEM image (with lower magnification) of CoNWs .

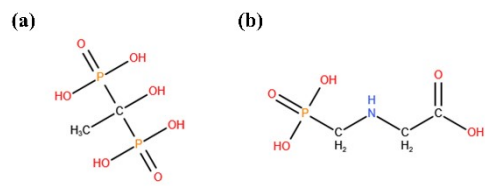

**Fig. S2.** The structures of HEDP (a) and PMG(b).

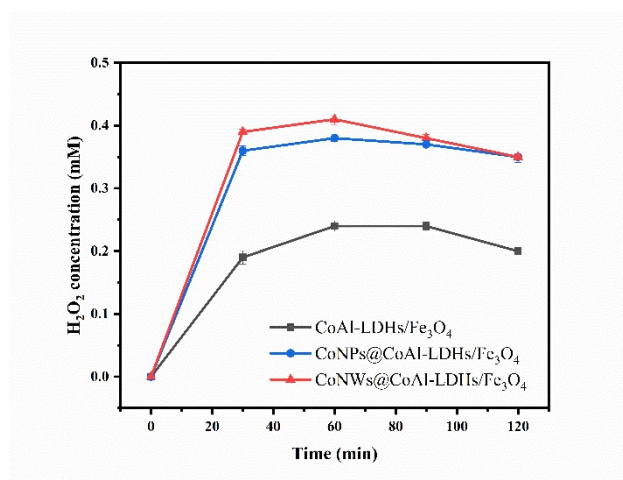

**Fig. S3.** The concentration of H<sub>2</sub>O<sub>2</sub> by different catalysts.

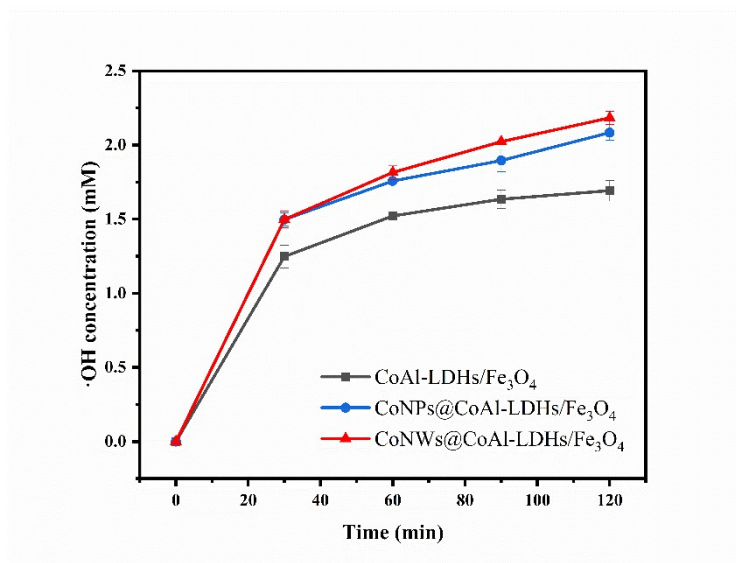

**Fig. S4.** The concentration of  $\cdot\text{OH}$  by different catalysts.

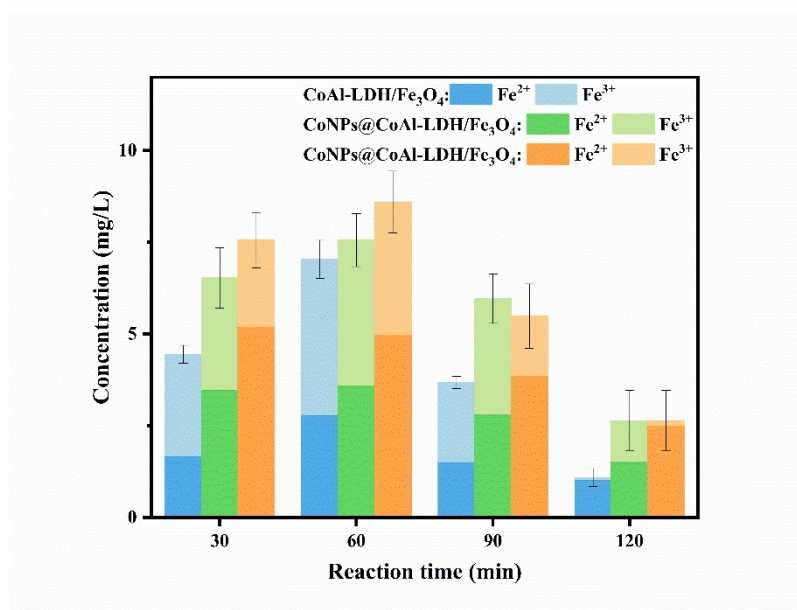

**Fig. S5.** The concentration of Fe<sup>2+</sup>/ Fe<sup>3+</sup> by different catalysts.

**Table. S1.** Specific BET surface area, pore volume and average pore diameter of the CoNWs@CoAl-LDHs/Fe<sub>3</sub>O<sub>4</sub> and CoNPs@CoAl-LDHs/Fe<sub>3</sub>O<sub>4</sub> samples.

| Sample                                         | surface area (m <sup>2</sup> /g) | pore volume (cm <sup>3</sup> /g) | pore diameter (nm) |
|------------------------------------------------|----------------------------------|----------------------------------|--------------------|
| CoNWs@CoAl-LDHs/Fe <sub>3</sub> O <sub>4</sub> | 44.6639                          | 0.1412                           | 12.5191            |
| CoNPs@CoAl-LDHs/Fe <sub>3</sub> O <sub>4</sub> | 35.5203                          | 0.0768                           | 7.9800             |
